# Supplementary material
Source: PubMed Central journal article supplement (PMC5915342)
Supplement: NIHMS959138-supplement-Supplementary_Information.pdf [file NIHMS959138-supplement-Supplementary_Information.pdf]

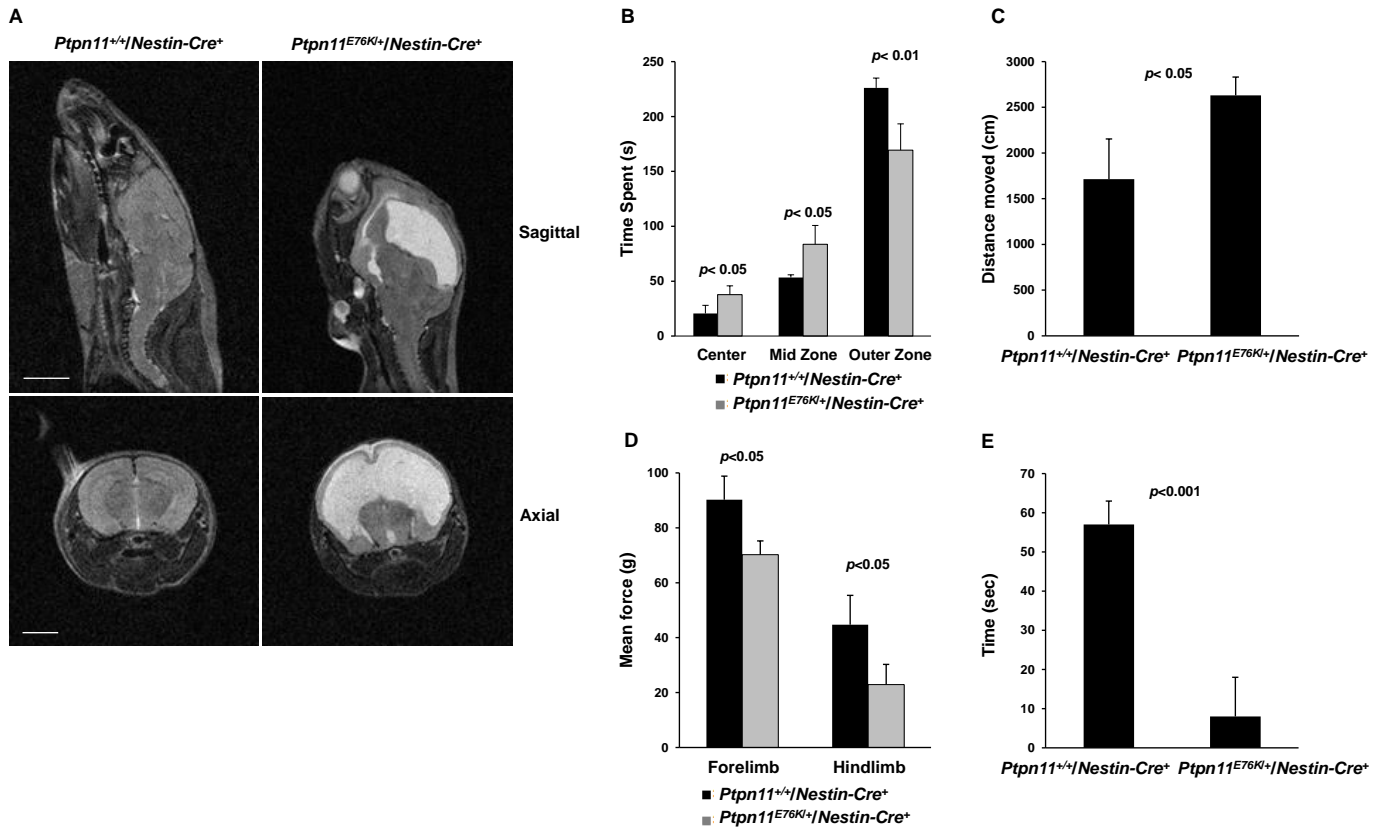

**Fig. S1. The *Ptpn11<sup>E76K</sup>* mutation induces brain developmental defects with aberrant behaviors.** (A) T2-weighted sagittal and axial magnetic resonance imaging scans were performed on *Ptpn11<sup>E76K/+</sup>/Nestin-Cre<sup>+</sup>* and *Ptpn11<sup>+/+</sup>/Nestin-Cre<sup>+</sup>* mice ( $n=3$  mice per genotype) at one month of age. (B-E) Behavioral profiles of male *Ptpn11<sup>E76K/+</sup>/Nestin-Cre<sup>+</sup>* and *Ptpn11<sup>+/+</sup>/Nestin-Cre<sup>+</sup>* littermates at 5-6 months of age ( $n=5$  mice per genotype) were determined. The duration times mice spent in the center, mid zone, or outer zone (B), and the total distance mice moved (C) in open field tests were recorded. Mean forces of forelimbs and hindlimbs were measured in grip strength tests (D). The duration times mice hung on the wire before falling off were recorded in wire hang tests (E). Female *Ptpn11<sup>E76K/+</sup>/Nestin-Cre<sup>+</sup>* and *Ptpn11<sup>+/+</sup>/Nestin-Cre<sup>+</sup>* littermates at 5-6 months of age ( $n=4$  mice per genotype) were also assessed. Analyses in all panels were performed in 3-4 independent experiments. Data are presented as mean $\pm$ S.D. of biological replicates. Representative images are shown. Scale bars, 2 mm.

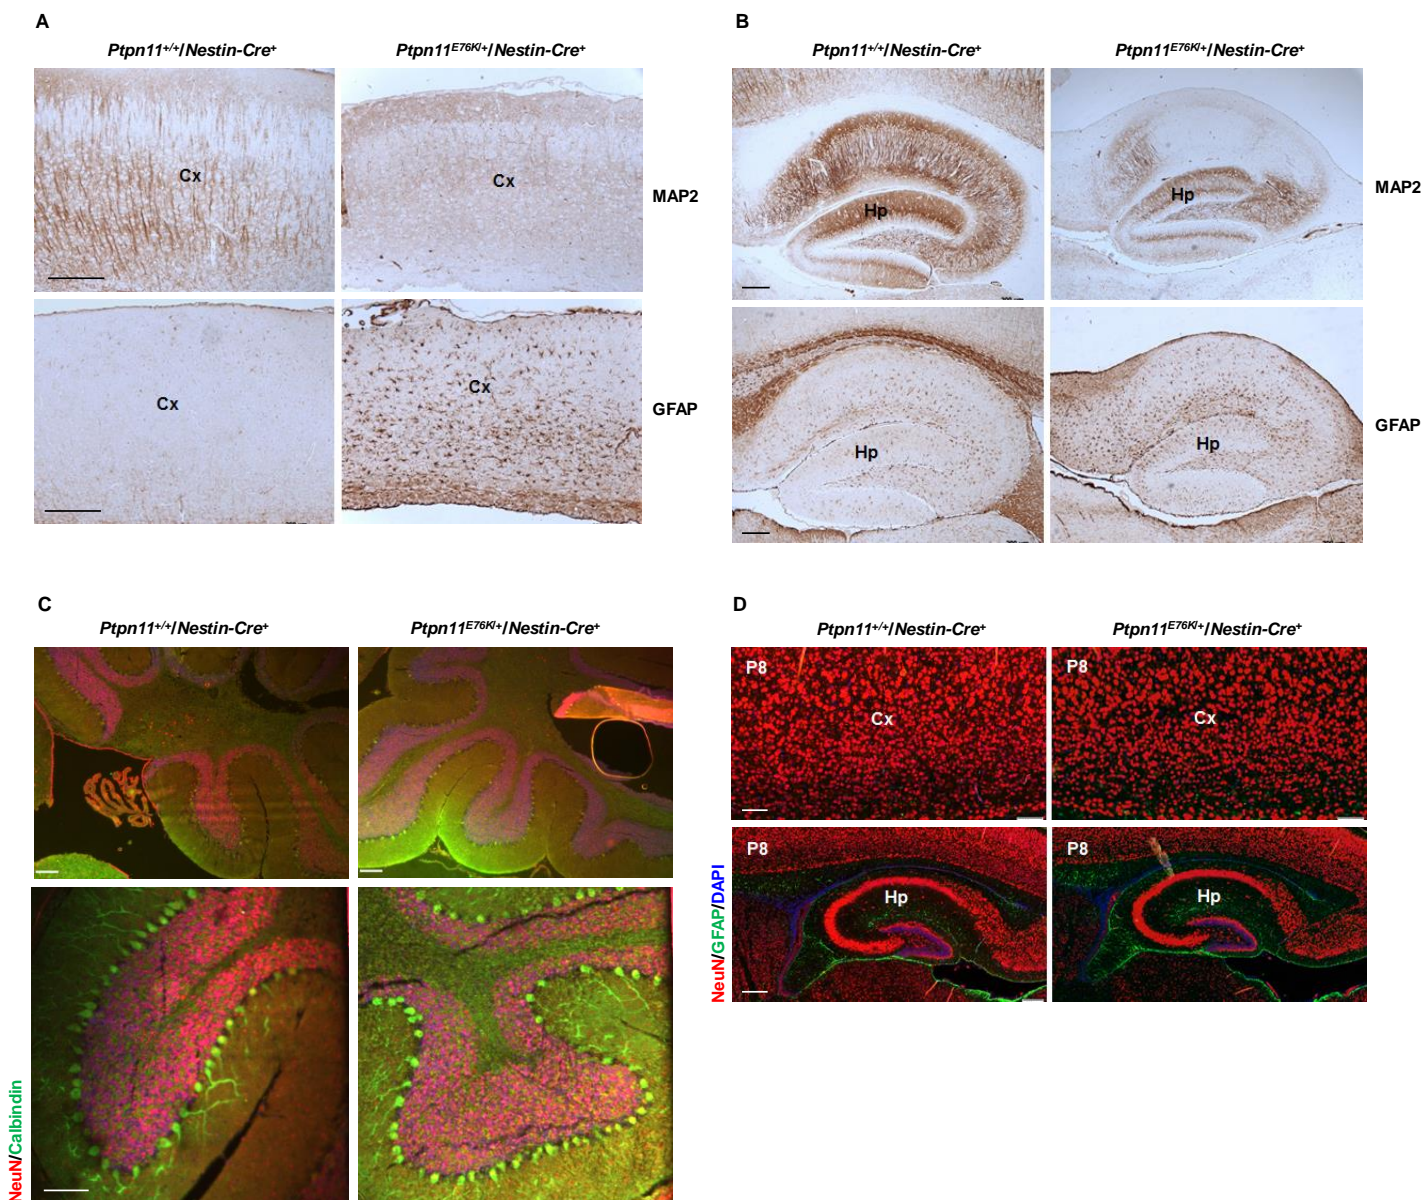

**Fig. S2. Neurons are reduced, and astrocytes are increased in the cerebral cortex and hippocampus of adult *Ptpn11*<sup>E76K/+</sup>/*Nestin-Cre*<sup>+</sup> mice.** (A and B) Brain sections prepared from *Ptpn11*<sup>E76K/+</sup>/*Nestin-Cre*<sup>+</sup> and *Ptpn11*<sup>+/+</sup>/*Nestin-Cre*<sup>+</sup> mice ( $n=4$  mice per genotype) at one month of age were processed for immunohistochemical staining to detect neurons (MAP2<sup>+</sup>) and astrocytes (GFAP<sup>+</sup>) in the cortex (A) and hippocampus (B). (C) Cerebellum sections prepared from *Ptpn11*<sup>E76K/+</sup>/*Nestin-Cre*<sup>+</sup> and *Ptpn11*<sup>+/+</sup>/*Nestin-Cre*<sup>+</sup> mice ( $n=4$  mice per genotype) at one month of age were processed for immunofluorescence staining of Calbindin (Purkinje cells) and NeuN (granule neurons). (D) Brain sections prepared from P8 *Ptpn11*<sup>E76K/+</sup>/*Nestin-Cre*<sup>+</sup> and *Ptpn11*<sup>+/+</sup>/*Nestin-Cre*<sup>+</sup> mice ( $n=3$  mice per genotype) were processed for immunofluorescence staining of NeuN (neurons) and GFAP (astrocytes). Cx, cortex; Hp, hippocampus. Analyses in all panels were performed in 3 independent experiments. Representative images are shown. Scale bars, 200 $\mu$ m (A, B, and D) and 100  $\mu$ m (C).

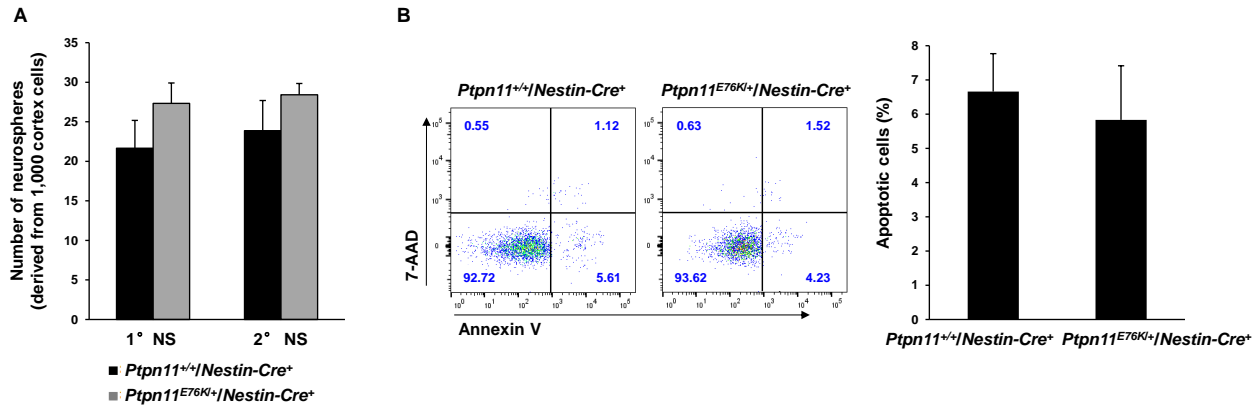

**Fig. S3. Total number and survival of NSPCs in the developing brain of *Ptpn11<sup>E76K/+</sup>/Nestin-Cre<sup>+</sup>* mice are not significantly changed.** (A) Cerebral cortices dissected from E14.5 *Ptpn11<sup>E76K/+</sup>/Nestin-Cre<sup>+</sup>* and *Ptpn11<sup>+/+</sup>/Nestin-Cre<sup>+</sup>* embryos ( $n=4$  mice per genotype) were assessed by neurosphere assays. Total number of primary neurospheres ( $1^0$  NS) (big and small) was determined after 7 days of culture. Single cells dissociated from primary neurospheres were subjected to neurosphere assays again, and secondary neurospheres ( $2^0$  NS) were quantified as above. (B) Primary neurospheres were harvested, dissociated into single cells, and examined for apoptotic cells by FACS analyses. Assays in all panels were conducted in 4 independent experiments. Data are presented as mean $\pm$ S.D. of biological replicates.

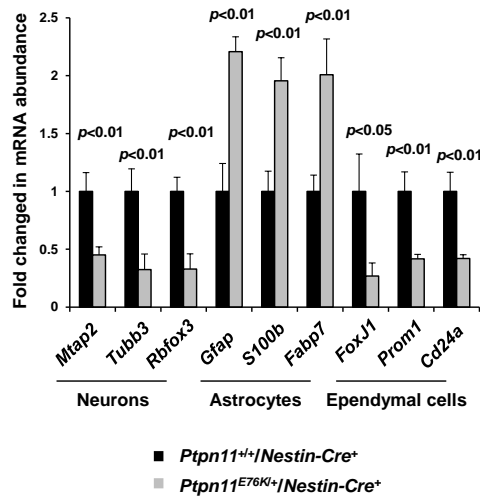

**Fig. S4. Neuron and ependymal cell differentiation is decreased, whereas astrocyte differentiation is increased in *Ptpn11*<sup>E76K/+</sup>/*Nestin-Cre*<sup>+</sup> NSPCs.** Lateral ventricular walls were dissected from *Ptpn11*<sup>E76K/+</sup>/*Nestin-Cre*<sup>+</sup> and *Ptpn11*<sup>+/+</sup>/*Nestin-Cre*<sup>+</sup> newborn pups ( $n=3$  mice per genotype), dissociated into single cells, and then processed for ependymal cell differentiation assays. The differentiated cells were harvested and subjected to real-time quantitative PCR analyses for mRNA abundance of the indicated cell lineage markers. Analyses were performed in 3 independent experiments. Data are presented as mean $\pm$ S.D. of biological replicates.

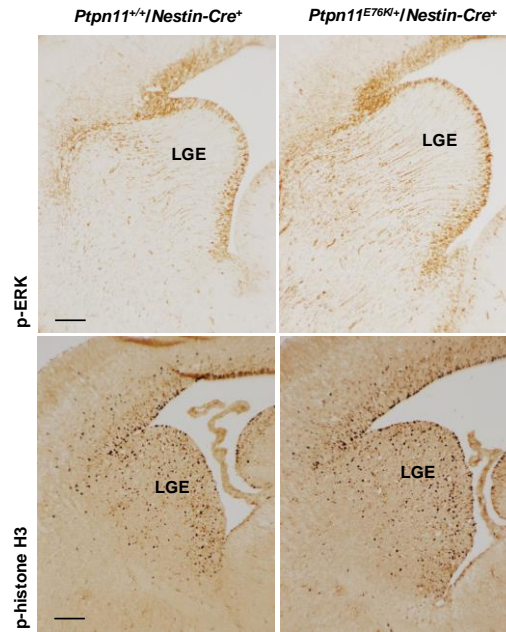

**Fig. S5. ERK activity in the developing brain of *Ptpn11<sup>E76K/+</sup>/Nestin-Cre<sup>+</sup>* mice is enhanced, but cell proliferation does not change.** Brain sections prepared from E14.5 *Ptpn11<sup>E76K/+</sup>/Nestin-Cre<sup>+</sup>* and *Ptpn11<sup>+/+</sup>/Nestin-Cre<sup>+</sup>* embryos ( $n=3$  mice per genotype) were processed for immunohistochemical staining of phosphorylated ERK (p-ERK) and phosphorylated histone H3 (p-histone H3) in the lateral ganglionic eminence (LGE). Analyses were performed in 3 independent experiments. Representative images are shown. Scale bars, 100  $\mu\text{m}$ .

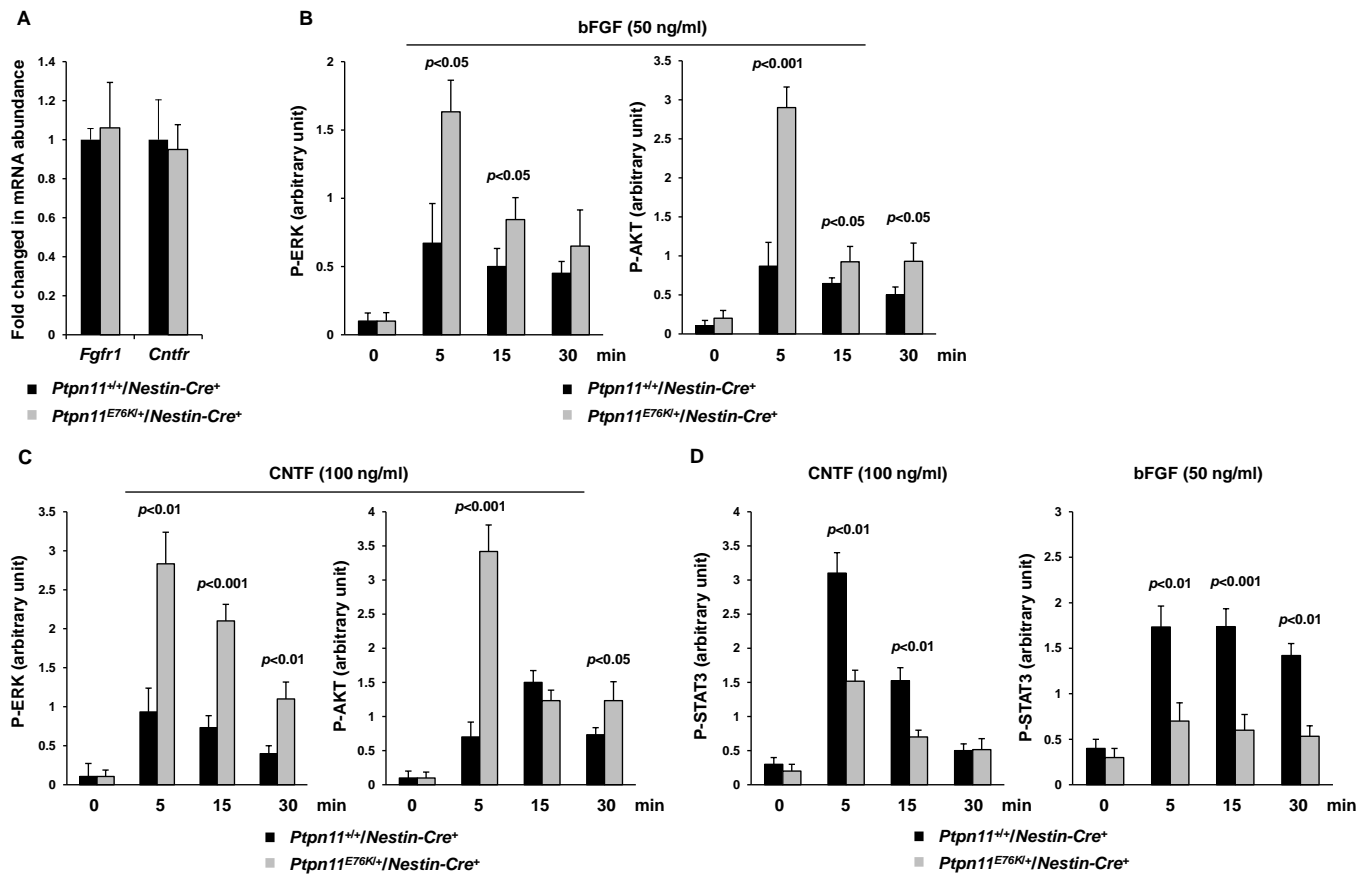

**Fig. S6. Similar abundance of bFGF and CNTF receptors in *Ptpn11<sup>E76K/+</sup>/Nestin-Cre<sup>+</sup>* and *Ptpn11<sup>+/+</sup>/Nestin-Cre<sup>+</sup>* NSPCs.** (A) Neurospheres were generated from E14.5 *Ptpn11<sup>E76K/+</sup>/Nestin-Cre<sup>+</sup>* and *Ptpn11<sup>+/+</sup>/Nestin-Cre<sup>+</sup>* embryos ( $n=3$  mice per genotype). They were dissociated into single cells and cultured in the presence of bFGF (20 ng/ml) for 5 days. Cells were harvested and subjected to real-time quantitative PCR analyses for mRNA abundance of bFGFR and CNTFR. (B-D) Densitometric data of phosphoproteins (normalized to pan proteins) were summarized from 3 mice per genotype in Fig. 4B, 4C, and 4D. Analyses were performed in 3 independent experiments. Data are presented as mean $\pm$ S.D. of biological replicates.



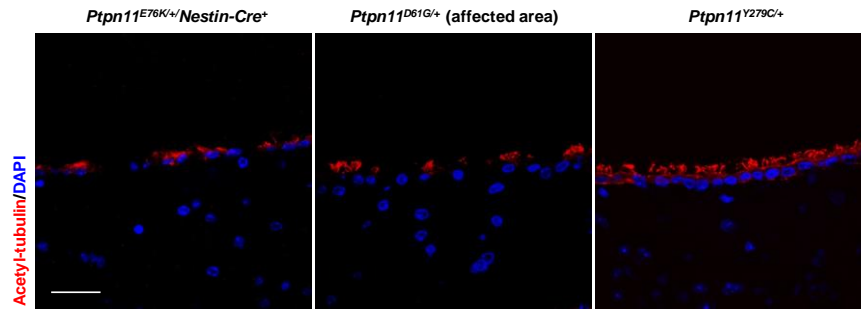

**Fig. S7. Defects of endymal cilia are proportionate to the catalytic activity of various mutant forms of SHP2.** Brain sections prepared from *Ptpn11*<sup>E76K/+</sup>/*Nestin-Cre*<sup>+</sup>, *Ptpn11*<sup>D61G/+</sup>, and *Ptpn11*<sup>Y279C/+</sup> mice ( $n=3$  mice per genotype) at 12 months of age were processed for immunofluorescence staining of acetyl  $\alpha$ -tubulin. Endymal cilia on the walls of ventricles were examined (*Ptpn11*<sup>D61G/+</sup> mice showed endymal cilia defects only on the third ventricular walls). Analyses were performed in 3 independent experiments. Representative images are shown. Scale bar, 50  $\mu\text{m}$ .

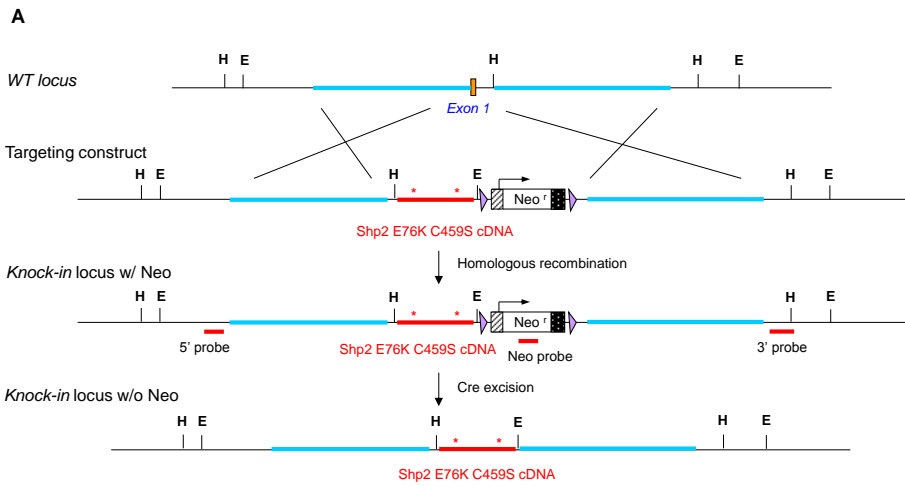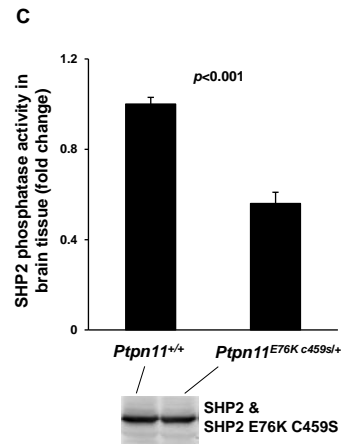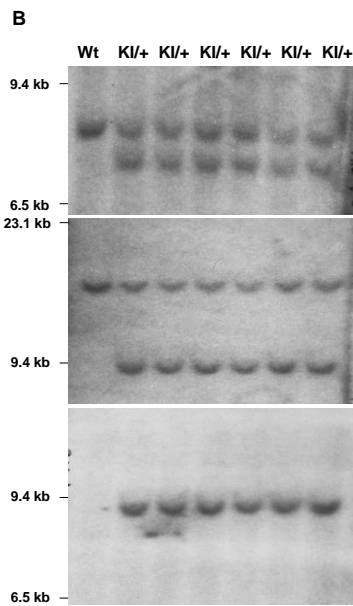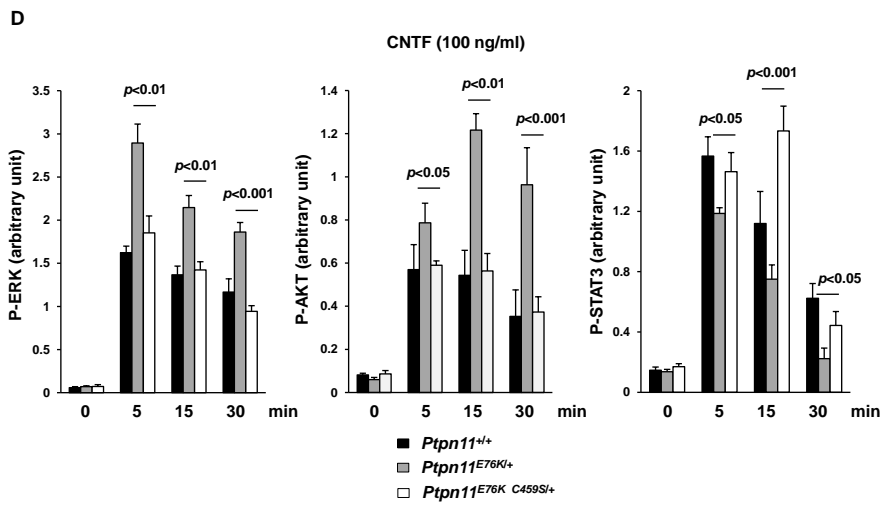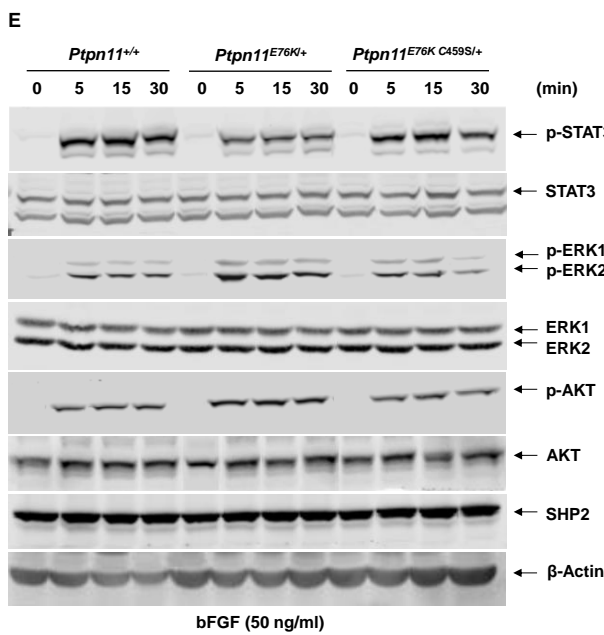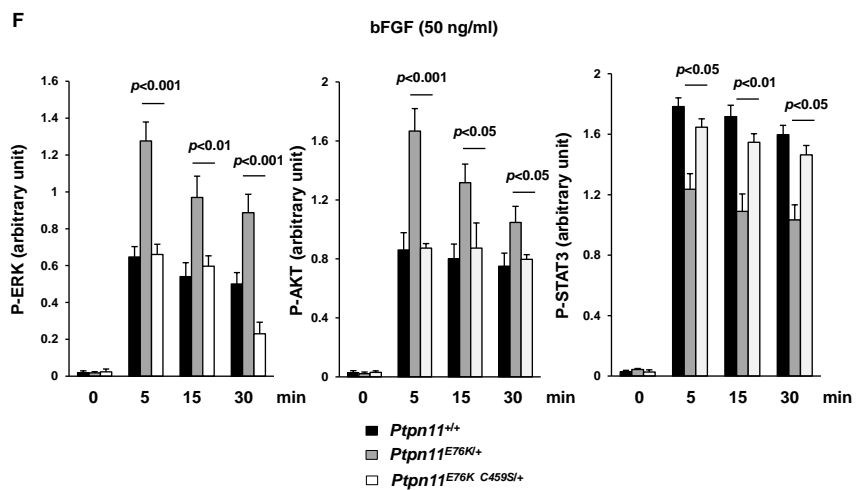



**Fig. S8. Generation and characterization of *Ptpn11*<sup>E76K,C459S/+</sup> mice.** (A) Gene-targeting strategy for generation of *Ptpn11*<sup>E76K,C459S</sup> double mutation knock-in mice. (B) Genomic DNA extracted from targeting vector-transfected embryonic stem cell clones was digested with the indicated DNA restrictive enzymes followed by Southern blotting using the probe labeled with digoxigenin-11-dUTP following standard procedures. Wildtype (Wt) and *Ptpn11*<sup>E76K C459S/+</sup> (KI/+) clones were identified. (C) Brain tissues isolated from *Ptpn11*<sup>E76K,C459S/+</sup> and *Ptpn11*<sup>+/+</sup> littermates (*n*=3 mice per genotype) were lysed. SHP2 enzymatic activities in the lysates were assessed by the immunocomplex phosphatase assay. (D) Densitometric data of phosphoproteins (normalized to pan proteins) were summarized from 3 mice per genotype in Fig. 7E. (E) Neurospheres derived from *Ptpn11*<sup>+/+/Nestin-Cre<sup>+</sup></sup>, *Ptpn11*<sup>E76K/+ /Nestin-Cre<sup>+</sup></sup>, and *Ptpn11*<sup>E76K,C459S/+</sup> mice (*n*=3 mice per genotype) were processed for analyses of bFGF-induced cell signaling, as described in Fig. 4B and 4D. (F) Densitometric data of phosphoproteins (normalized to pan proteins) were summarized from (E). Analyses in (C), (D), and (E) were performed in 3 independent experiments. Data are presented as mean±S.D. of biological replicates. Representative images are shown.
